# Supplementary material for: pH-responsive cancer-targeted selenium nanoparticles: a transformable drug carrier with enhanced theranostic effects
Source: Royal Society of Chemistry journal article supplement (doi:10.1039/c4tb00399c), 2014-01-01
Supplement: c4tb00399c1.pdf [file c4tb00399c1.pdf]

## Supporting information

for

# pH-Responsive Cancer-targeted Selenium Nanoparticles: A Transformable Drug Carrier with Enhanced Theranostic Effects

Bo Yu <sup>a</sup>, Xiaoling Li <sup>a</sup>, Wenjie Zheng <sup>a,\*</sup>, Yanxian Feng <sup>a</sup>, Yum-Shing Wong <sup>b</sup>, Tianfeng Chen <sup>a,\*</sup>

<sup>a</sup> Department of Chemistry, Jinan University, Guangzhou 510632, China

<sup>b</sup> School of Life Science and State Key Laboratory for Agrobiotechnology, The Chinese University of Hong Kong, Hong Kong S.A.R, China

\* To whom correspondence should be addressed. Room 643, Department of Chemistry, Jinan University, Guangzhou 510632, China. Tel: +86 20-85225962; Fax: +86 20 85221263.

**Running title:** *In Vitro* Action of pH-Responsive Transformable Selenium Nanoparticles.

\*Corresponding author: Tel: +86 20-85220223; Fax: +86 20 85221263.

**E-mail:** tchentf@jnu.edu.cn (T. Chen); tzhwj@jnu.edu.cn (W. Zheng).

## RESULTS

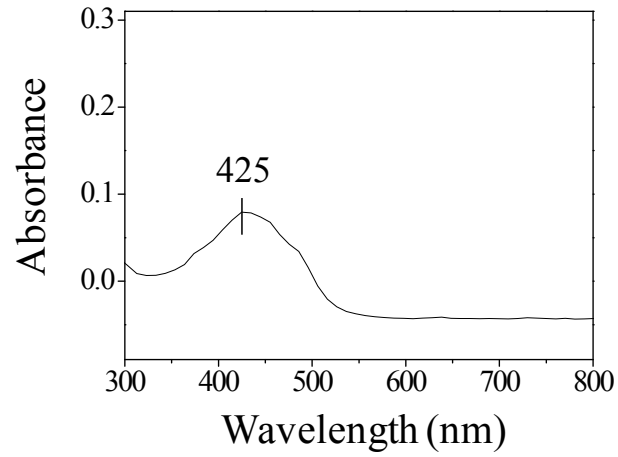

**Fig. S1.** Representative UV-vis spectrum of CurP.

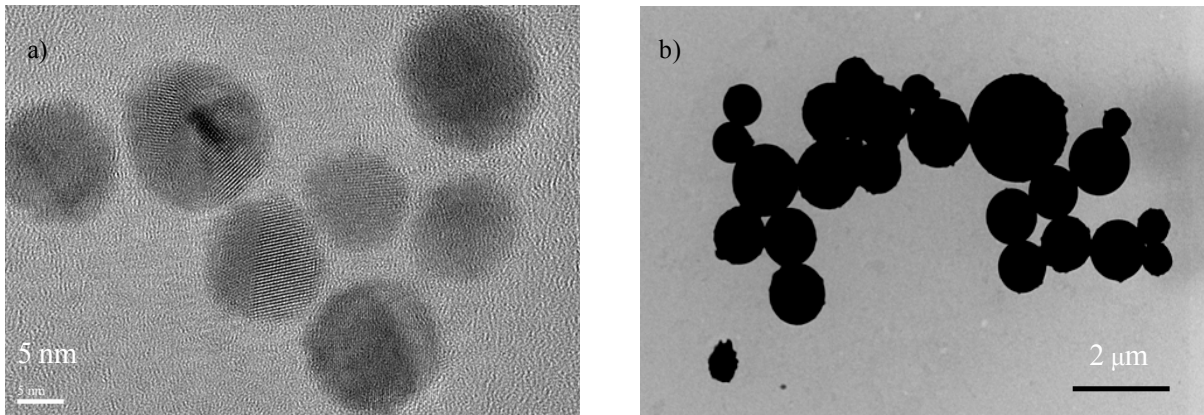

**Fig. S2.** Representative HRTEM images of CurP-SeNPs(a) and TEM images of SeNPs

(b).

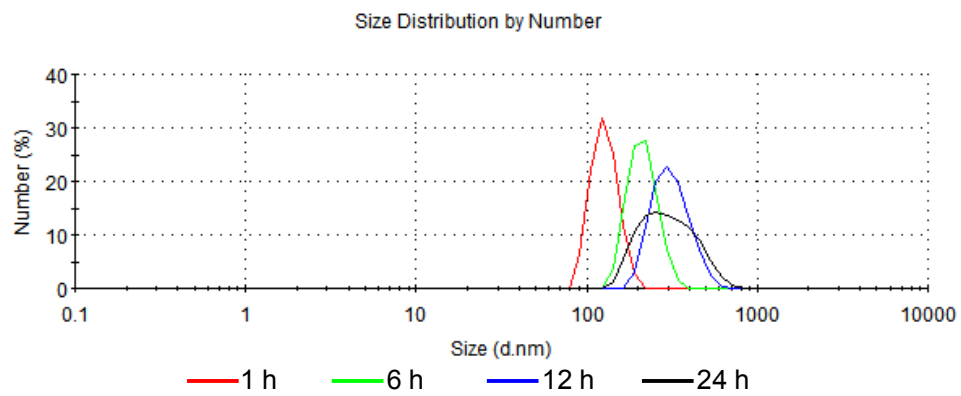

**Fig. S3.** Representative size distribution of FAC@CurP-SeNPs diffused in PBS solution (pH 5.3) for different time.

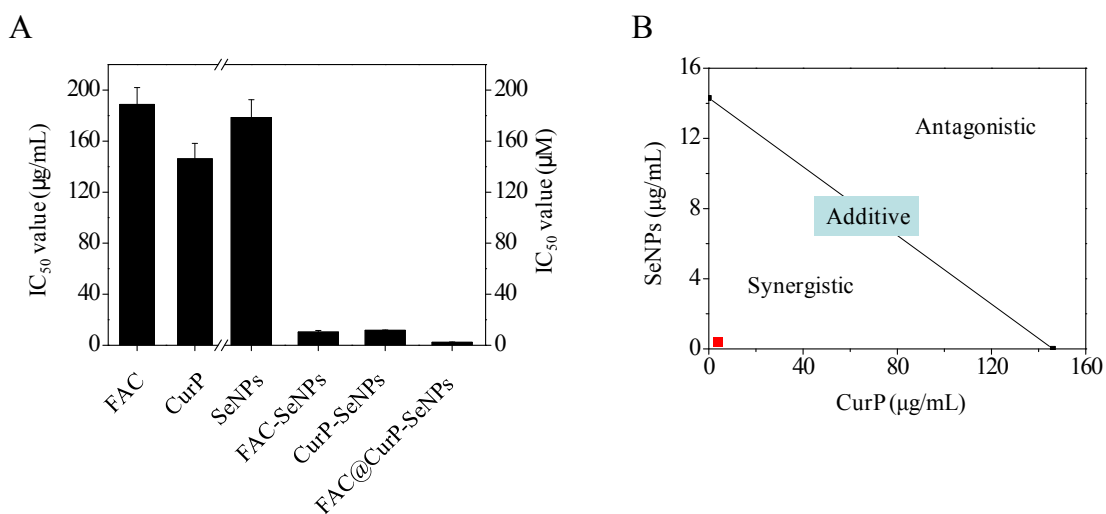

**Fig. S4.** (A) Growth inhibition of FAC@CurP-SeNPs and corresponding IC<sub>50</sub> value of FAC, CurP, SeNPs, FAC-SeNPs and CurP-SeNPs on MCF-7. Cell viability was determined by a colorimetric MTT assay. Under the corresponding conditions, the IC<sub>50</sub> values for FAC, CurP, SeNPs, FAC-SeNPs, CurP-SeNPs and FAC@CurP-SeNPs on MCF-7 cells were found at 188.8 μg/mL, 146.1 μg/mL, 178.5 μM (14.3 μg/mL), 10.3 μM (0.824 μg/mL), 11.7 μM (0.944 μg/mL) and 2.4 μM (0.912 μg/mL), respectively. (B) Isobologram analysis of the antiproliferative effects of SeNPs and CurP on MCF-7 cells, CI of the IC<sub>50</sub> value of FAC@CurP-SeNPs was found at 0.056. Each IC<sub>50</sub> value represents the mean ± S.D. of three independent experiments.

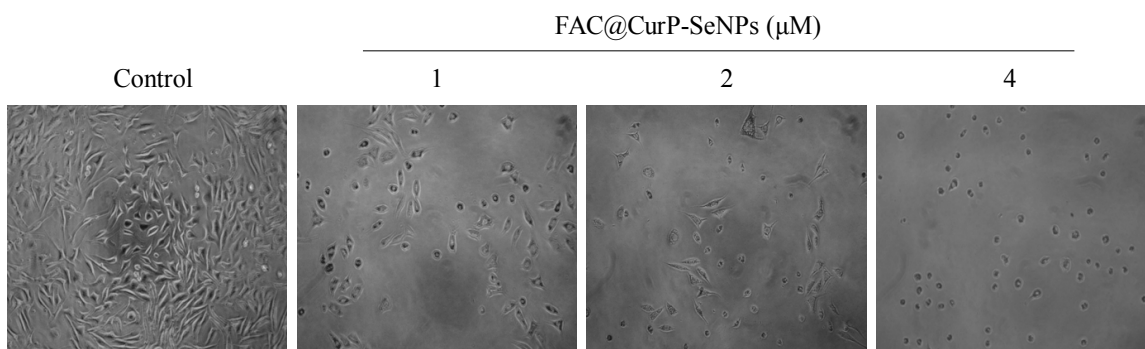

**Fig. S5.** Morphology of MCF-7 cells treated with FAC@CurP-SeNPs for 72 h.
